# Supplementary material
Source: PubMed Central journal article supplement (PMC4981127)
Supplement: supp_tpc.16.00016_TPC2016-00016-RAR1_Supplemental_DataRev.pdf [file supp_tpc.16.00016_TPC2016-00016-RAR1_Supplemental_DataRev.pdf]

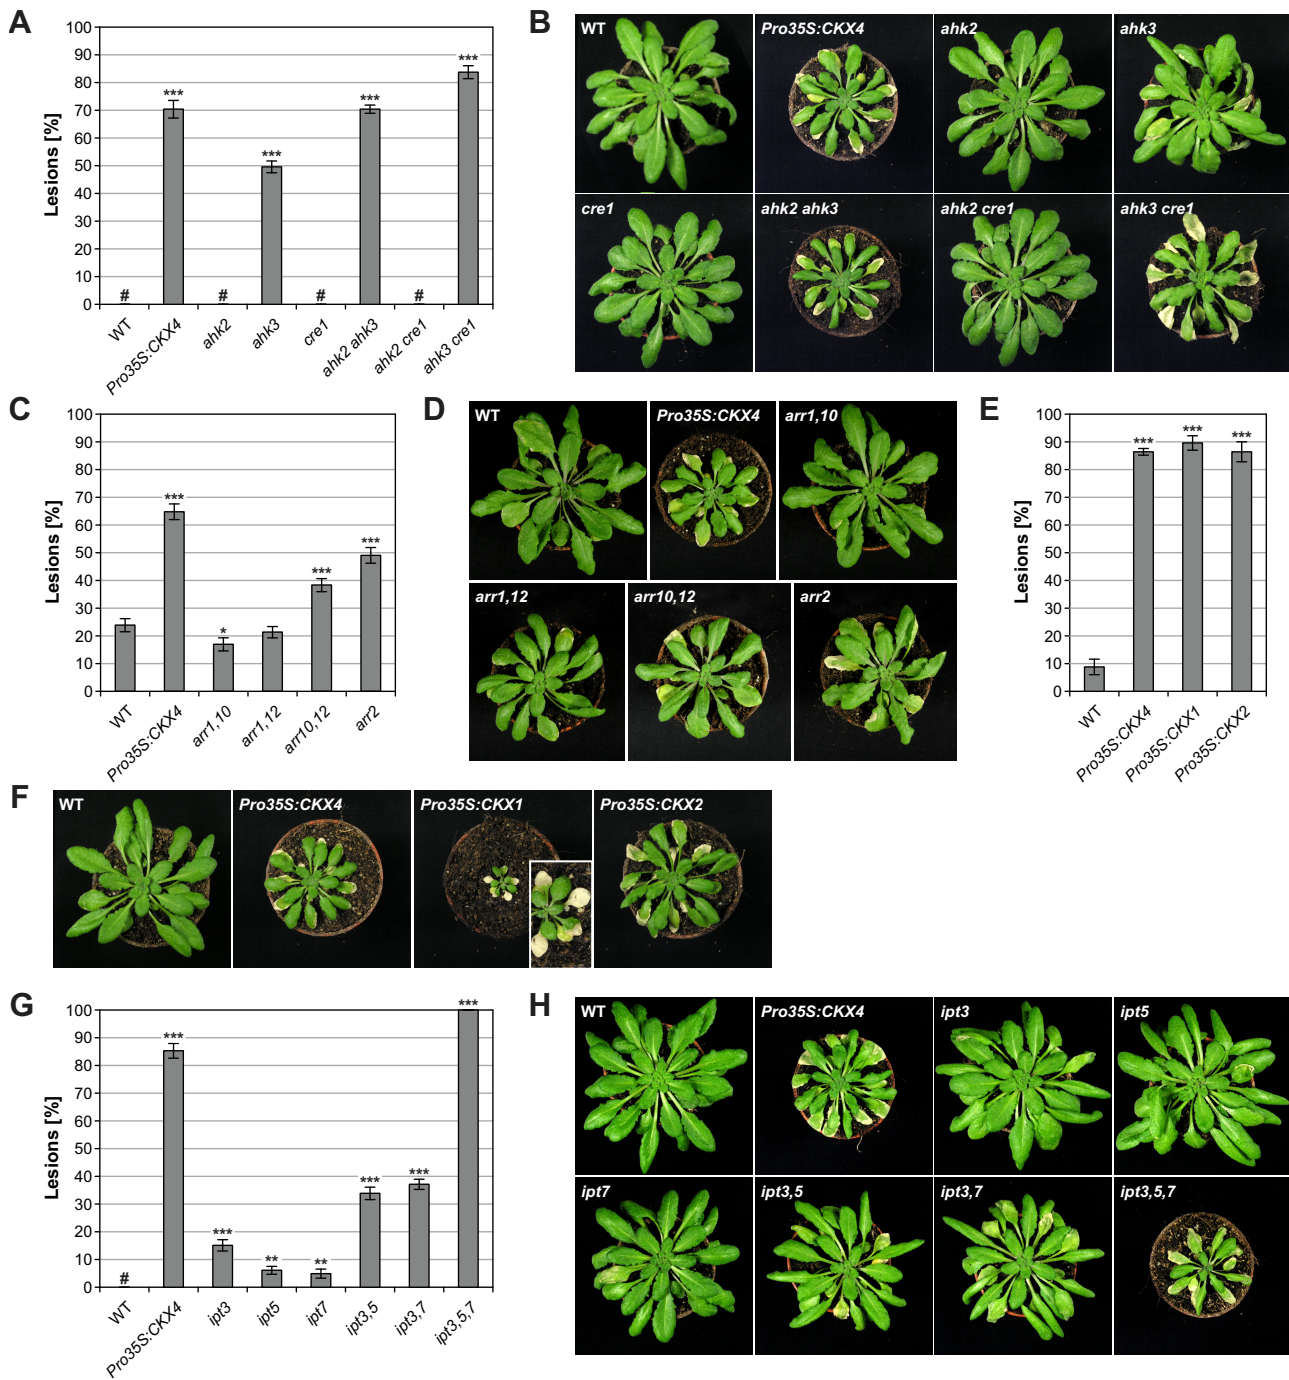

**Supplemental Figure 1.** Defective Cytokinin Signaling and a Reduced Cytokinin Content Lead to Cell Death in Response to CL Treatment.

(A), (C), (E), and (G) Percentage of mature leaves with lesions in cytokinin receptor mutants ([A],  $n = 10$ ), B-type *arr* mutants ([C],  $n = 16$ ), *CKX* overexpressing transgenic plants ([E],  $n = 8-12$ ), and *ipt* mutants ([G],  $n = 14$ ) 1 d after CL treatment. #, not detected.

(B), (D), (F), and (H) Representative phenotypes 2 to 3 d after CL treatment, showing lesions in plants with defective cytokinin signaling or reduced cytokinin levels in comparison with wild-type. *Pro35S:CKX4* transgenic plants served as a positive control.

Data are mean values  $\pm$  SE. Asterisks indicate significant differences from wild type (black). \*  $P < 0.05$ ; \*\*  $P < 0.01$ ; \*\*\*  $P < 0.001$  (*t* test).

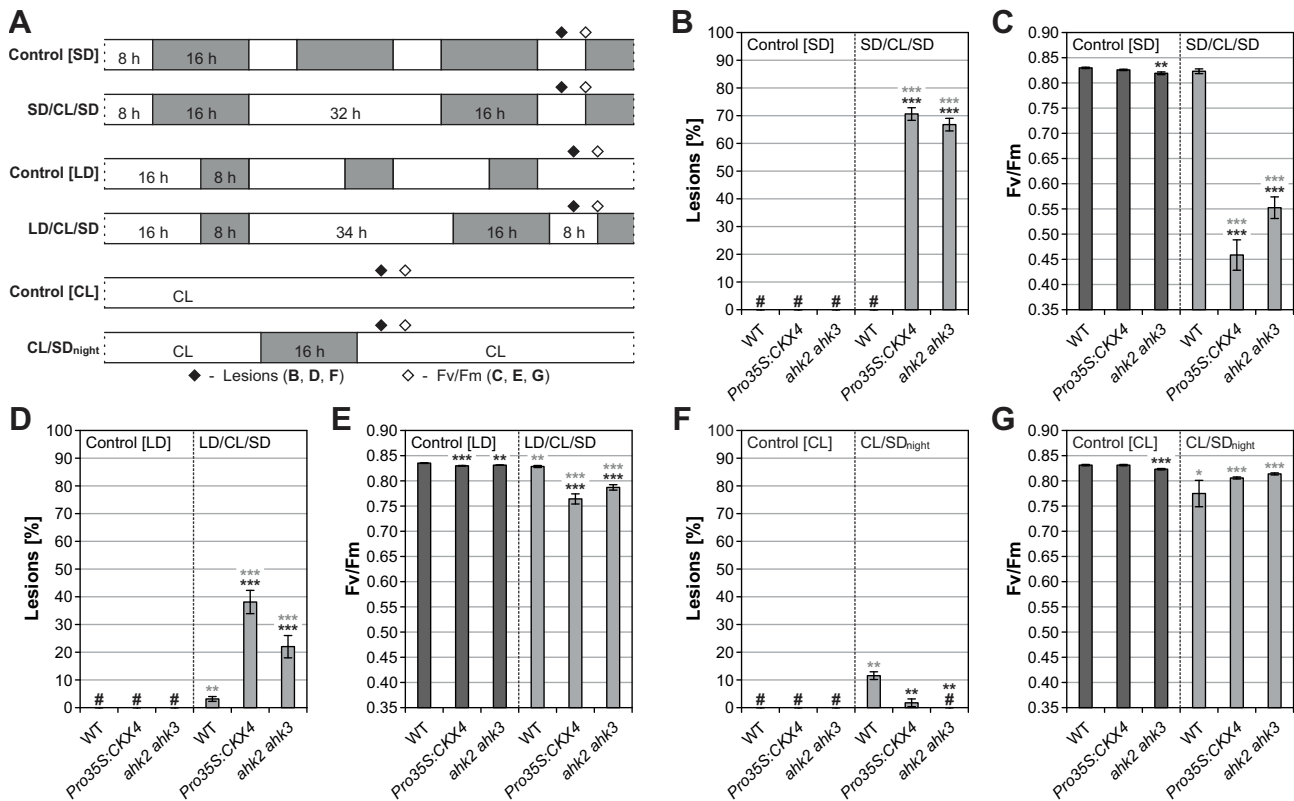

**Supplemental Figure 2.** The Entrainment Strongly Influences the Severity of Cell Death Following Changes in the Light-Dark Regime.

(A) Experimental scheme for (B) to (G). White, light period; gray, dark period; SD, short day; CL, continuous light; LD, long day. Time of sampling is indicated by rhombs.

(B) to (G) Analysis of the response to changes in the light-dark regimes after different entrainment regimes. Percentage of mature leaves with lesions ([B],  $n = 10$ ; [D],  $n = 10$ ; [F],  $n = 7$ ; #, not detected) and stress-induced decrease in  $F_v/F_m$  ([C],  $n = 12$ ; [E],  $n = 15$ ; [G],  $n = 20$ ), measured at time points indicated in (A). Consequences of SD (~5 weeks, [B] and [C]), LD (~4 weeks, [D] and [E]), and CL entrainment (~3 weeks, [F] and [G]).

Data are mean values  $\pm$  SE. Asterisks indicate significant differences from respective wild types (black) and corresponding controls (gray). \*  $P < 0.05$ ; \*\*  $P < 0.01$ ; \*\*\*  $P < 0.001$  ( $t$  test).

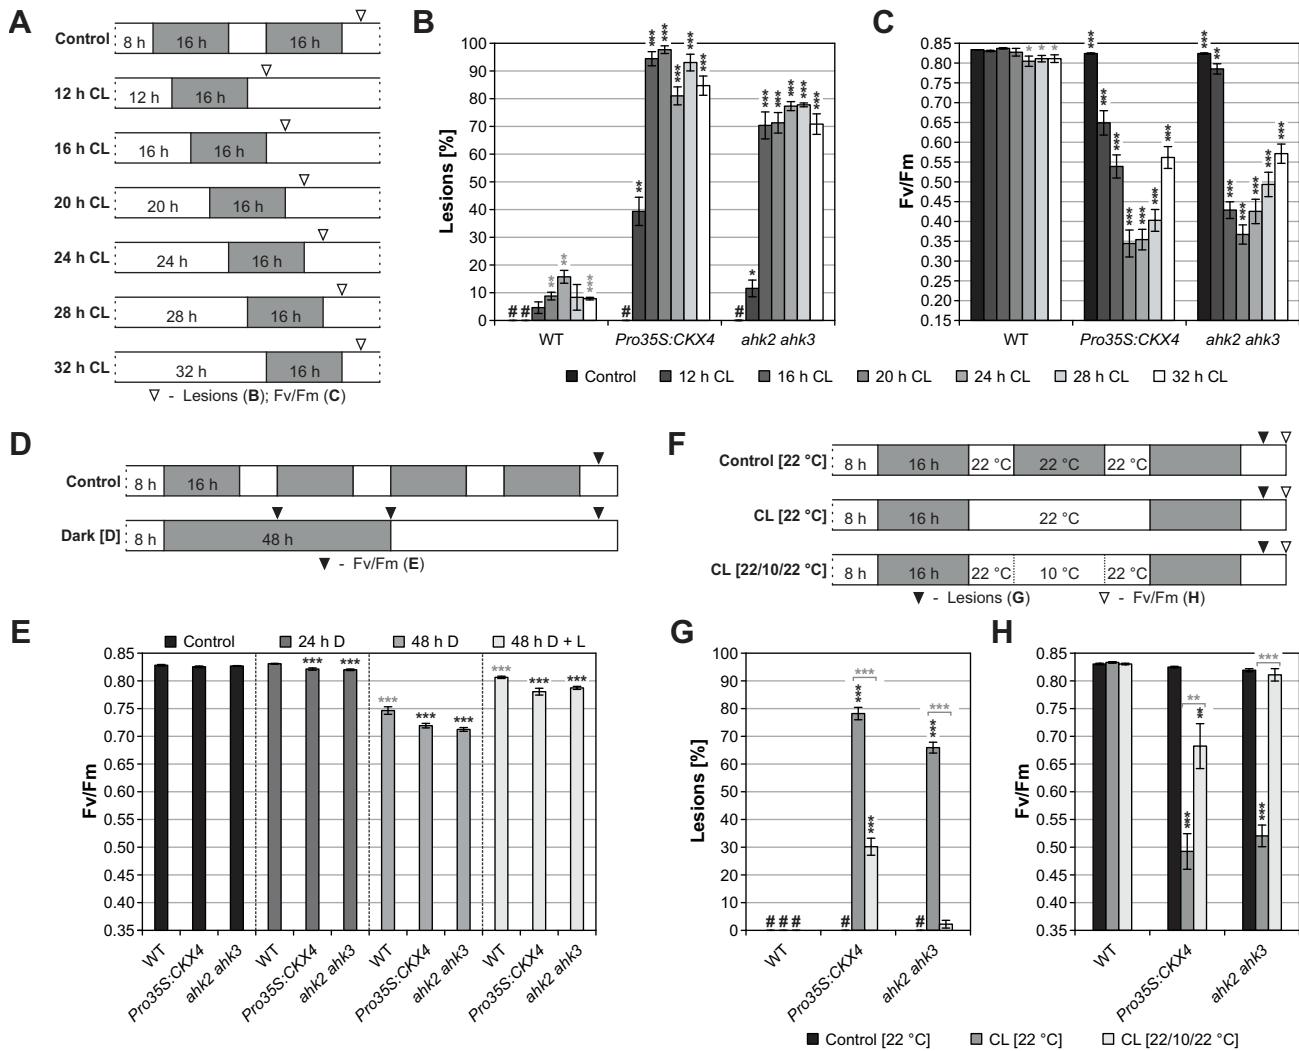

**Supplemental Figure 3.** The Cell Death Phenotype Depends on an Extended Light Period and can be Alleviated by Temperature Cycles.

(A) Experimental scheme for (B) and (C) to analyze the influence of prolonged light treatments of varying length. Plants were SD-entrained for 6 weeks. Controls remained under SD conditions. White, light period; gray, dark period; SD, short day; CL, continuous light. Time of sampling is indicated by triangles.

(B) and (C) Percentage of mature leaves with lesions (B,  $n = 5$ ; #, not detected) and stress-induced decrease in  $F_v/F_m$  (C,  $n = 12$ ), measured at time points indicated in (A).

(D) Experimental scheme for (E) to examine the influence of a prolonged dark period. Plants were SD-entrained for 5 weeks. Time of sampling is indicated by triangles.

(E)  $F_v/F_m$  after prolonged dark periods (D) and after relaxation (L, light) from 48 h of darkness ( $n = 12$ ).

(F) Experimental scheme for (G) and (H) to test the influence of a temperature cycle. Plants were SD-entrained for 6 weeks. Time of sampling is indicated by triangles.

(G) and (H) Percentage of mature leaves with lesions (G,  $n = 10$ ; #, not detected) and stress-induced decrease in  $F_v/F_m$  (H,  $n = 12$ ), measured at time points indicated in (F).

Data are mean values  $\pm$  SE. Asterisks indicate significant differences from the respective wild types (black), the corresponding controls (gray in [B], [C], and [E], for wild type only), and between the two CL treatments (gray in [G] and [H]). \*  $P < 0.05$ ; \*\*  $P < 0.01$ ; \*\*\*  $P < 0.001$  ( $t$  test).

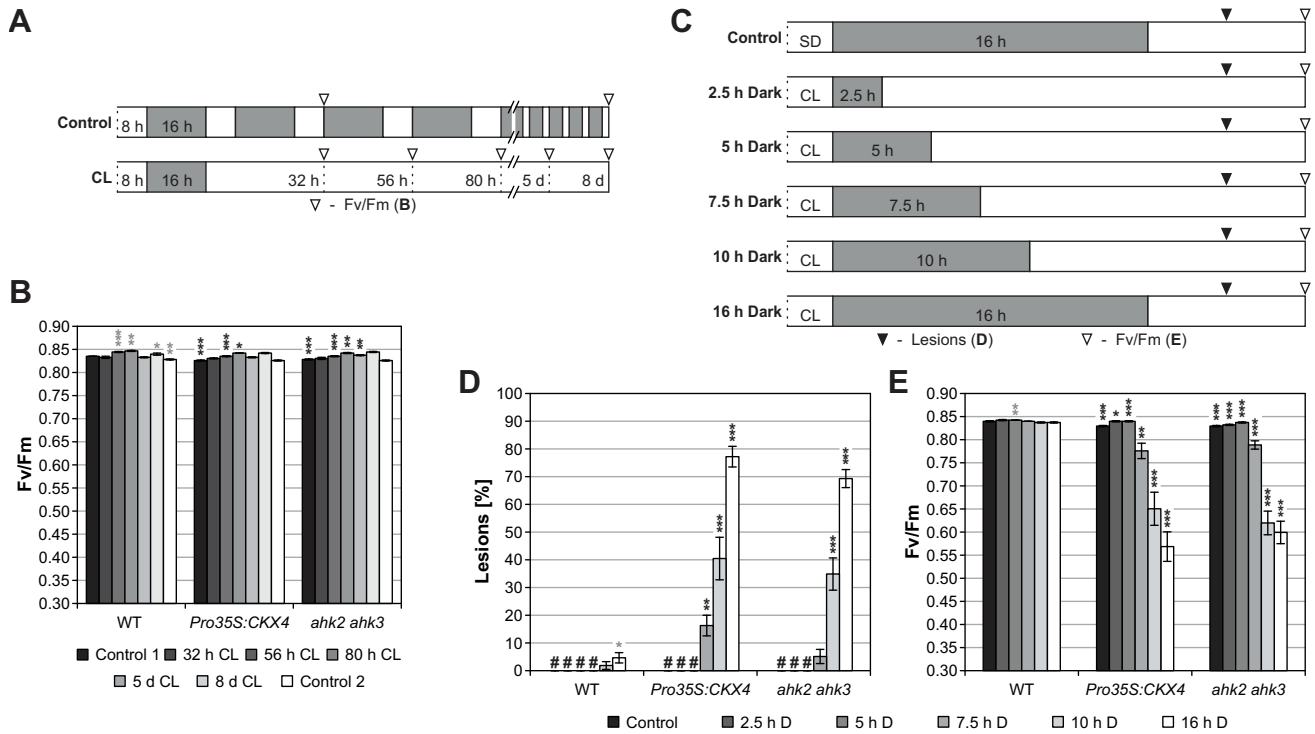

**Supplemental Figure 4.** A Dark Period Following Extended Light Treatment Is Required to Induce the Cell Death Phenotype.

**(A)** Experimental scheme for **(B)** to test the influence of continuous light treatment without a following dark period. Plants were SD-entrained for 5 weeks. White, light period; gray, dark period; CL, continuous light; SD, short day. Time of sampling is indicated by triangles.

**(B)** Stress-induced decrease in  $F_v/F_m$  ( $n = 12$ ), measured at time points indicated in **(A)**.

**(C)** Experimental scheme for **(D)** and **(E)** to examine the influence of dark periods of different length following standard CL treatment. Plants were SD-entrained for 5 weeks. Time of sampling is indicated by triangles.

**(D)** and **(E)** Percentage of mature leaves with lesions [**D**],  $n = 10$ ; #, not detected) and stress-induced decrease in  $F_v/F_m$  [**E**],  $n = 14$ ) measured at time points indicated in **(C)**.

Data are mean values  $\pm$  SE. Asterisks indicate significant differences from the respective wild types (black) and the corresponding controls (gray, for wild type only). \*  $P < 0.05$ ; \*\*  $P < 0.01$ ; \*\*\*  $P < 0.001$  ( $t$  test).

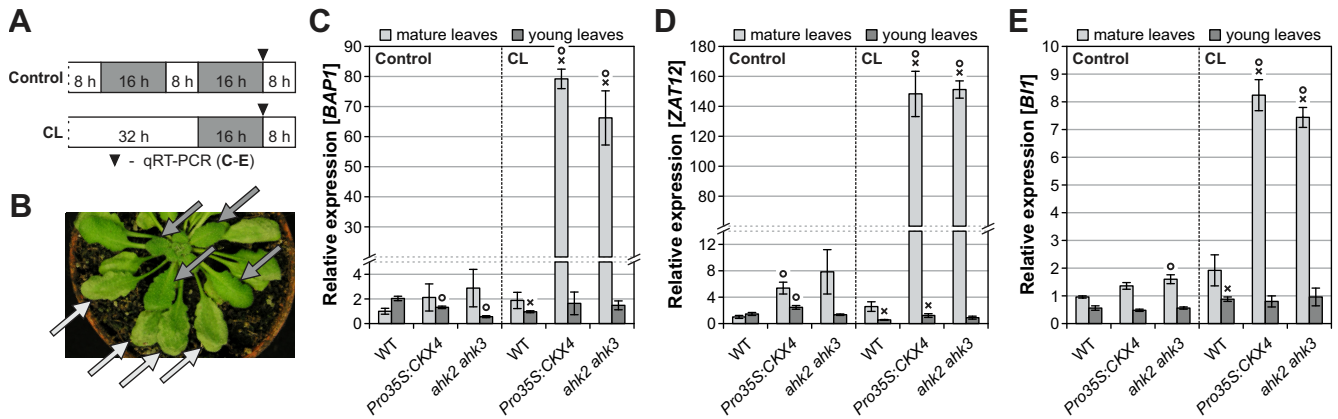

**Supplemental Figure 5.** Induction of Stress- and Cell Death-Associated Genes Only Occurs in Mature Leaves, Initiating Cell Death.

**(A)** Experimental scheme for **(C)** to **(E)**. Prior to the experiment plants were SD-entrained for 6 weeks. Leaf samples were collected at the indicated time point (arrow head). White, light period; gray, dark period; SD, short day; CL, continuous light.

**(B)** Cell death phenotype of a *Pro35S:CKX4* plant following CL treatment at the time point indicated in **(A)**. Arrows point to affected mature leaves (light gray) and to unaffected young leaves (dark gray), corresponding to the sampled material in **(C)** to **(E)**.

**(C)** to **(E)** Transcript levels in mature and young leaves at the end of a 16-h dark period following CL treatment. The expression levels of oxidative stress marker genes *BAP1* **(C)** and *ZAT12* **(D)** and cell death marker gene *B11* **(E)** are shown. Expression levels were normalized to the mature leaves wild-type control, which was set to 1. Data are mean values of four biological replicates  $\pm$  SE. Symbols indicate significant differences ( $P < 0.05$ ; *t* test) from the corresponding control (X) and the respective wild type (O).

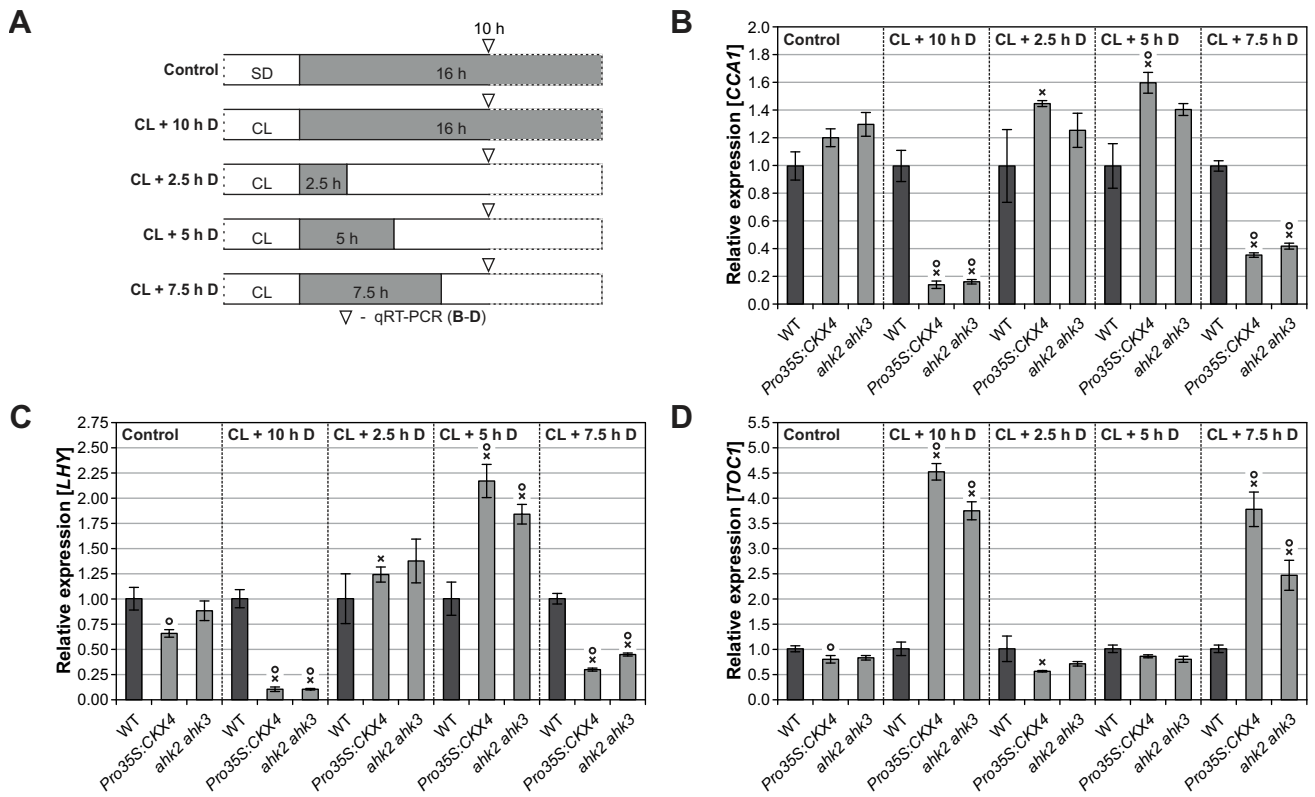

**Supplemental Figure 6.** Earlier Onset of Light, Following Short Nights after CL Treatment, Resets Circadian Clock Gene Expression, Coinciding with the Lack of Cell Death in Cytokinin-Deficient Plants.

**(A)** Experimental scheme for **(B)** to **(D)**. Prior to the experiment, plants were SD-entrained for 6 weeks. Leaf samples were collected at the indicated time point (arrow head). White, light period; gray, dark period (D); CL, continuous light.

**(B)** to **(D)** Transcript levels of clock genes *CCA1* **(B)**, *LHY* **(C)**, and *TOC1* **(D)** at the time point indicated in **(A)**. For plant phenotypes following different night lengths see Figure 4 and Supplemental Figure 4C to 4E. Expression levels were normalized to the corresponding wild type (dark gray columns) which were set to 1. Data are mean values of four biological replicates  $\pm$  SE. Symbols indicate significant differences ( $P < 0.05$ ;  $t$  test) from the corresponding control (X) and the respective wild type (O).

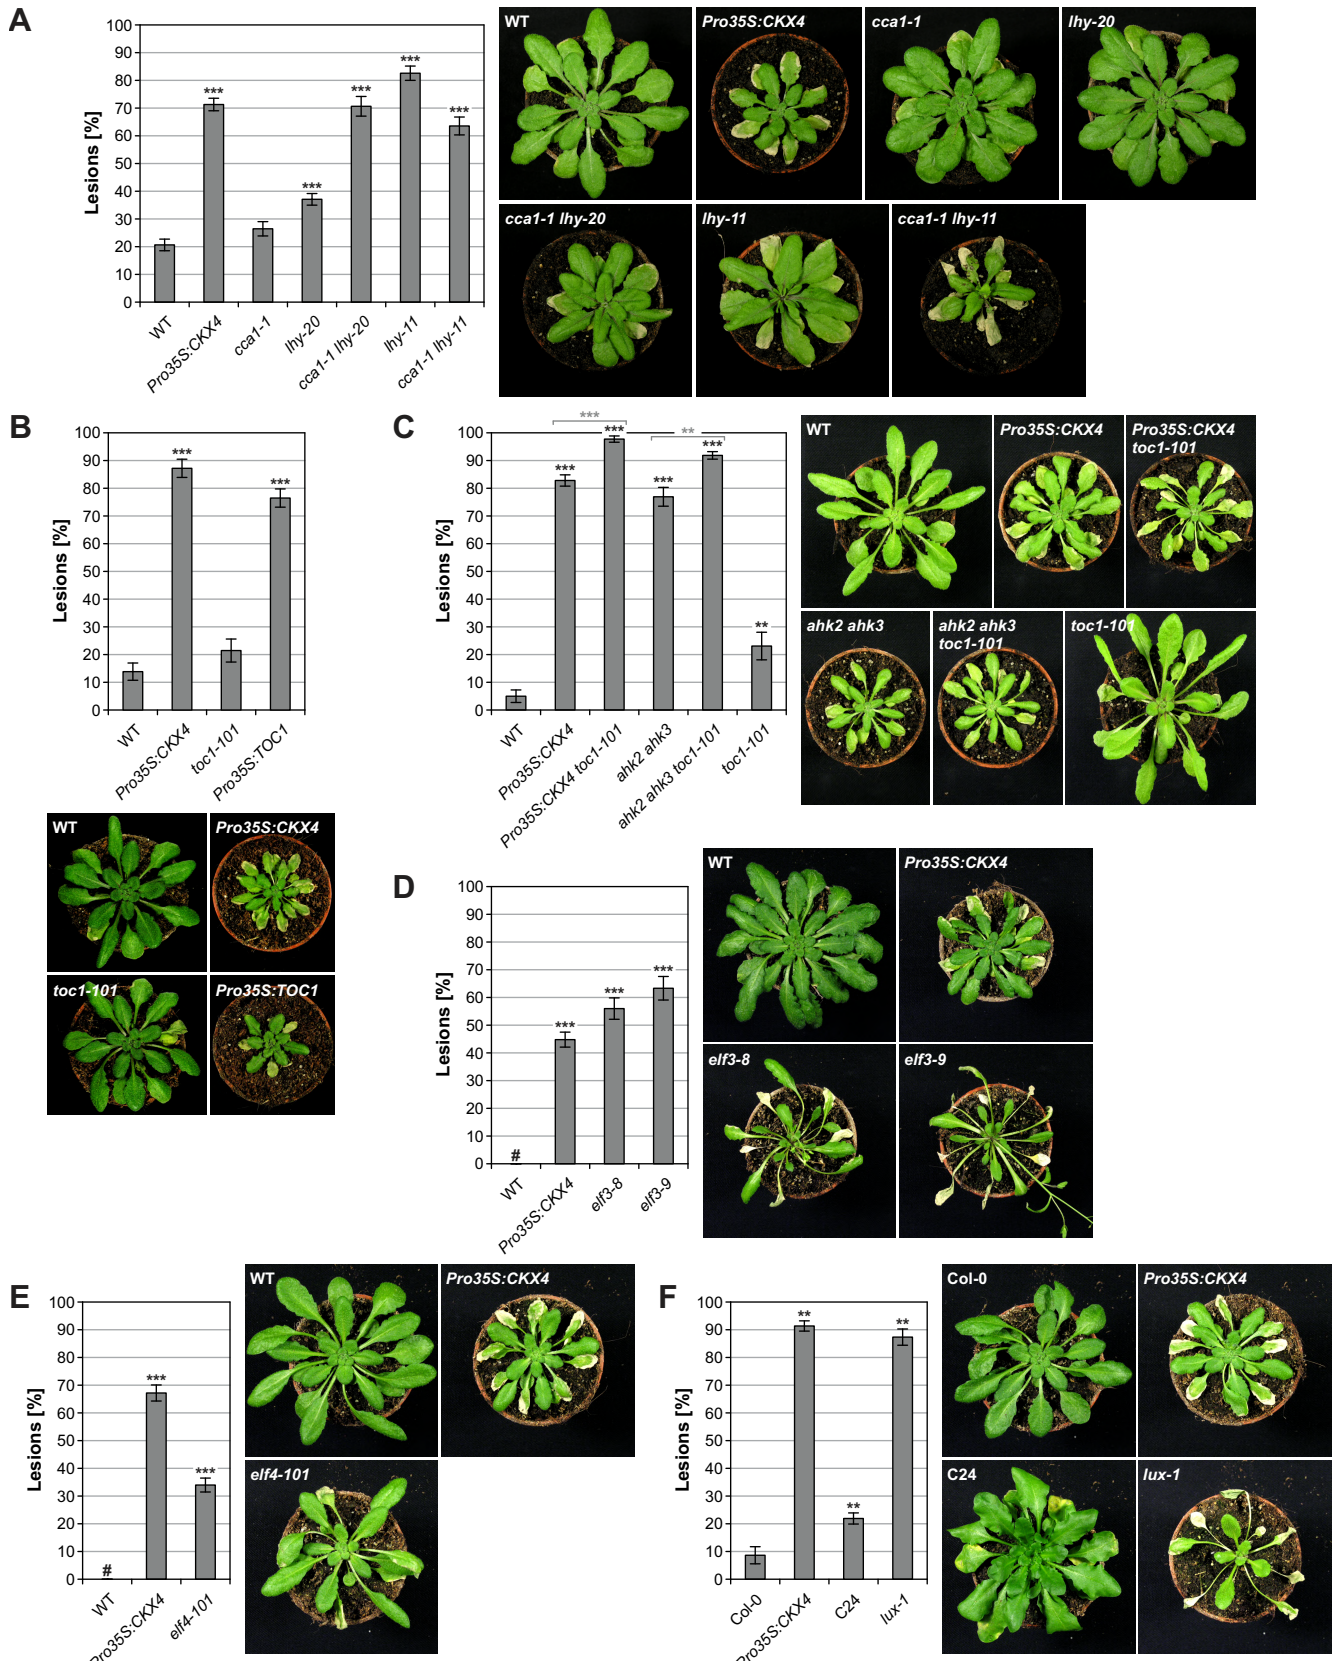

Supplemental Figure 7. Clock Mutants Are Also Sensitive to Circadian Stress.

**Supplemental Figure 7.** Clock Mutants Are Also Sensitive to Circadian Stress.

(A) to (F) Percentage of mature leaves with lesions in plants with *CCA1/LHY* loss-of-function (A), *TOC1* loss of function and overexpression (B), *TOC1* loss of function in the *Pro35S:CKX4* and *ahk2 ahk3* background, respectively (C) as well as in *elf3* (D), *elf4* (E), and *lux* mutants ([F], corresponding wild type of *lux-1* is C24) 1 d after CL treatment. Plants were SD-entrained for 5 to 6 weeks. For each experimental setup representative phenotypes 2 to 3 days after CL treatment are shown. Data are mean values  $\pm$  SE ( $n = 10-15$ ). Asterisks indicate significant differences from wild type (Col-0, black) and between cytokinin-deficient plants in the wild-type or *toc1-101* background (gray, in [C] only). \*\*  $P < 0.01$ ; \*\*\*  $P < 0.001$  (*t*-test).



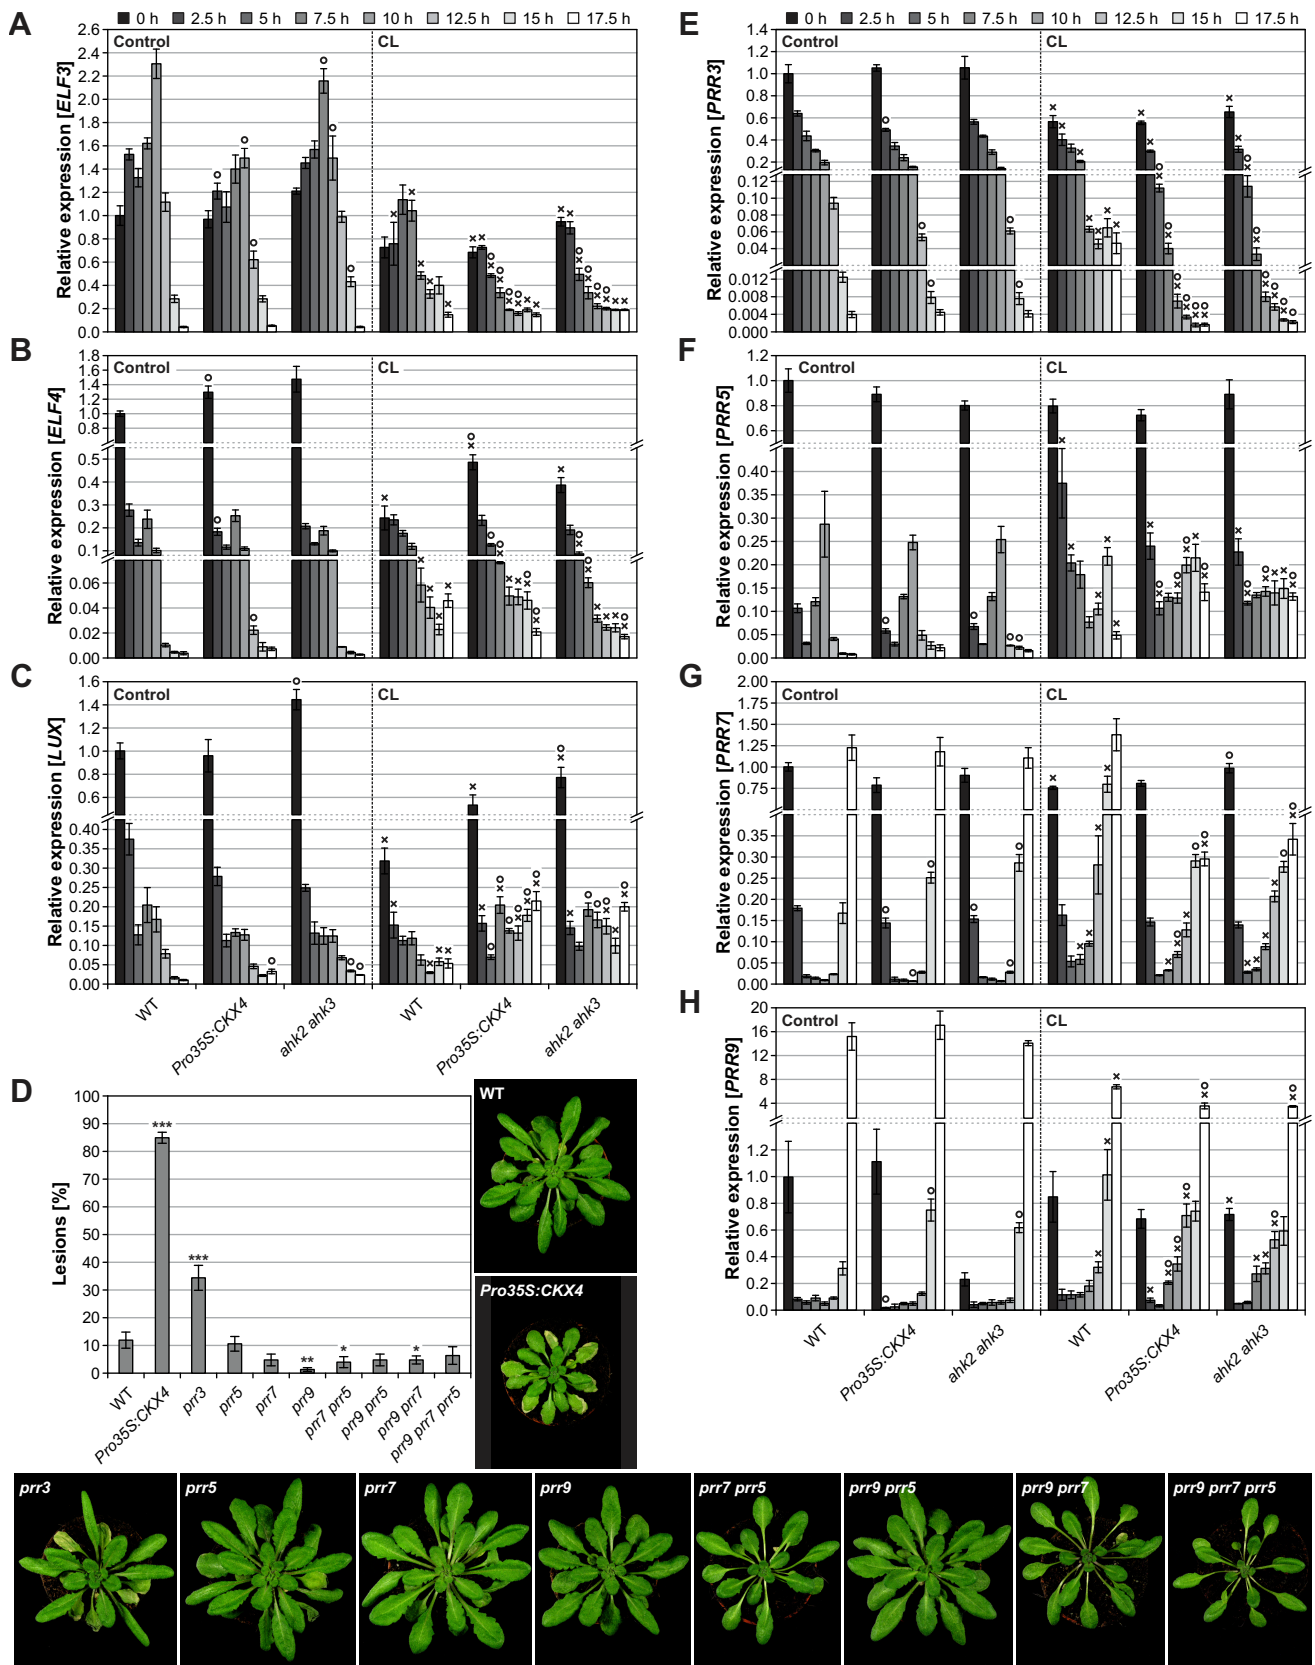

**Supplemental Figure 8.** Kinetics of Evening Complex and Pseudo-Response Regulator Gene Expression After CL Treatment and CL Responses of Different *prp* Mutants.

**Supplemental Figure 8.** Kinetics of Evening Complex and Pseudo-Response Regulator Gene Expression after CL Treatment and CL Responses of Different *prr* Mutants.

**(A) to (C)** Transcript abundances of *ELF3* **(A)**, *ELF4* **(B)**, and *LUX* **(C)** at different time points during the dark period following CL treatment (four biological replicates). The experimental scheme is shown in Figure 5B. Expression levels were normalized to the 0 h wild-type control, which was set to 1.

**(D)** Percentage of mature leaves with lesions in *prr* single, double, and triple mutant plants 1 d after CL treatment ( $n = 11$ ). Plants were 6 weeks old. Representative phenotypes 2 d after CL treatment are shown.

**(E) to (H)** Transcript abundances of *PRR3* **(E)**, *PRR5* **(F)**, *PRR7* **(G)**, and *PRR9* **(H)**. The experimental design is the same as in **(A) to (C)**.

Data are mean values  $\pm$  SE. Symbols in **(A) to (C)** and **(E) to (H)** indicate significant differences ( $P < 0.05$ ; *t* test) from the corresponding control (X) and the respective wild type (O). Asterisks in **(D)** indicate significant differences from wild type. \*  $P < 0.05$ ; \*\*  $P < 0.01$ ; \*\*\*  $P < 0.001$  (*t* test). CL, continuous light.

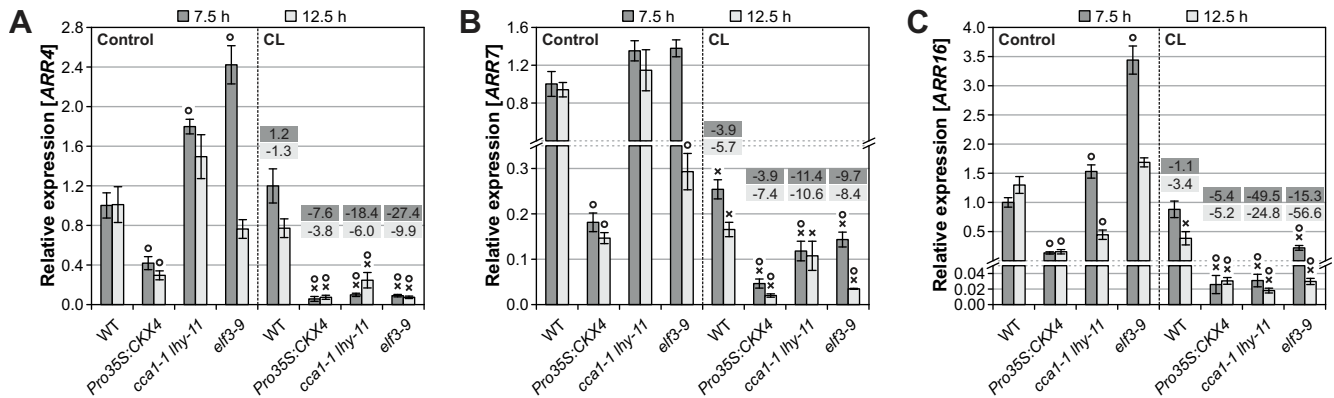

**Supplemental Figure 9.** A-Type *ARR* Gene Expression Is Decreased in *Pro35S:CKX4* Plants as well as in Clock Mutants in Response to Circadian Stress.

(A) to (C) Transcript levels of A-type *ARR* genes *ARR4* (A), *ARR7* (B), and *ARR16* (C) during the dark period at 7.5 and 12.5 h under control conditions (left) and after CL treatment (right), respectively. Fold changes of relative expression levels (CL conditions compared with respective control conditions) are displayed in the graphs. The experimental design corresponds to the one shown in Figure 5B. Expression levels were normalized to the 7.5 h wild-type control, which was set to 1. Data are mean values of four biological replicates  $\pm$  SE. Symbols indicate significant differences ( $P < 0.05$ ; *t* test) from the corresponding control (X) and the respective wild type (O).

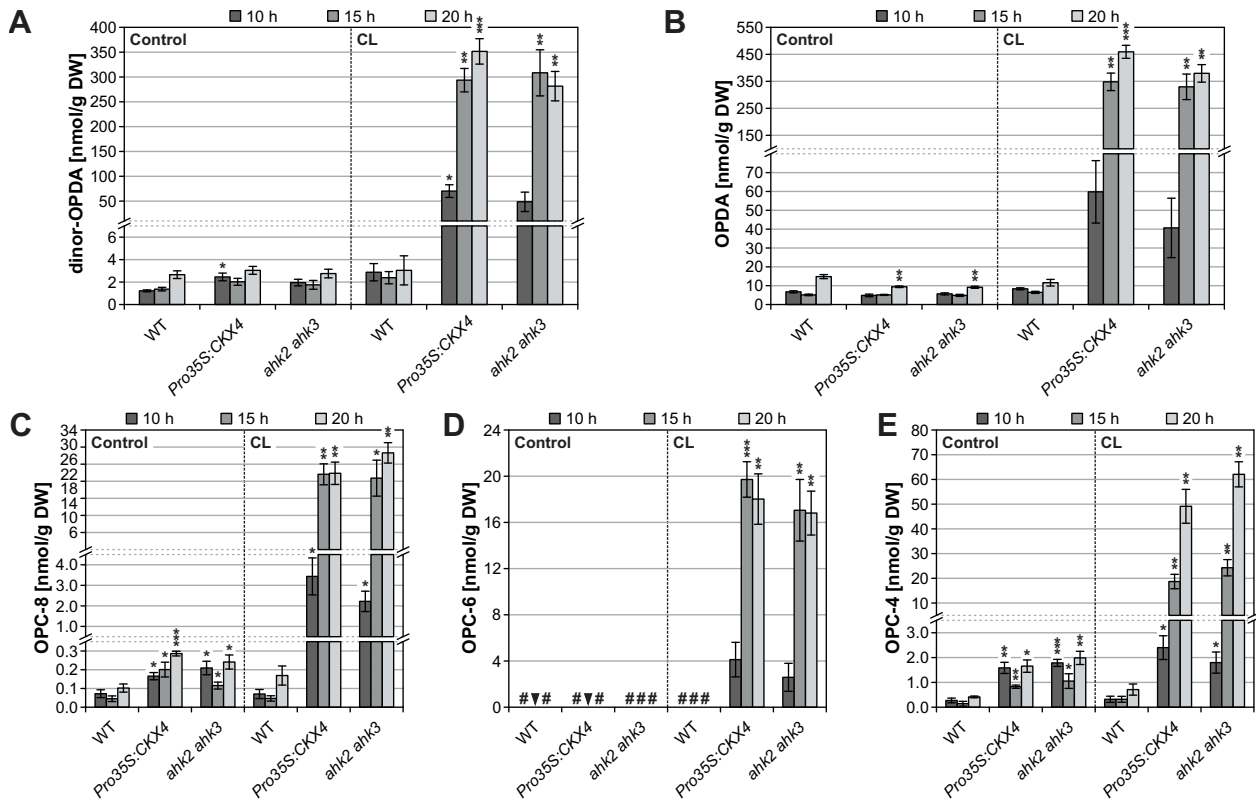

**Supplemental Figure 10. Jasmonic Acid Precursor Levels in Response to CL Treatment.**

(A) and (E) JA precursor contents measured at late time points following CL treatment as described in Figure 10A. OPDA, oxo-phytyldienoic acid; OPC, oxo-pentenyl-cyclopentane; #, not detected; triangles, < 0.01 nmol/g DW. Data are mean values  $\pm$  SE ( $n = 4$ ). Asterisks indicate significant differences from the respective wild types (black) and the corresponding controls (gray, for wild type only). \*  $P < 0.05$ ; \*\*  $P < 0.01$ ; \*\*\*  $P < 0.001$  ( $t$  test).

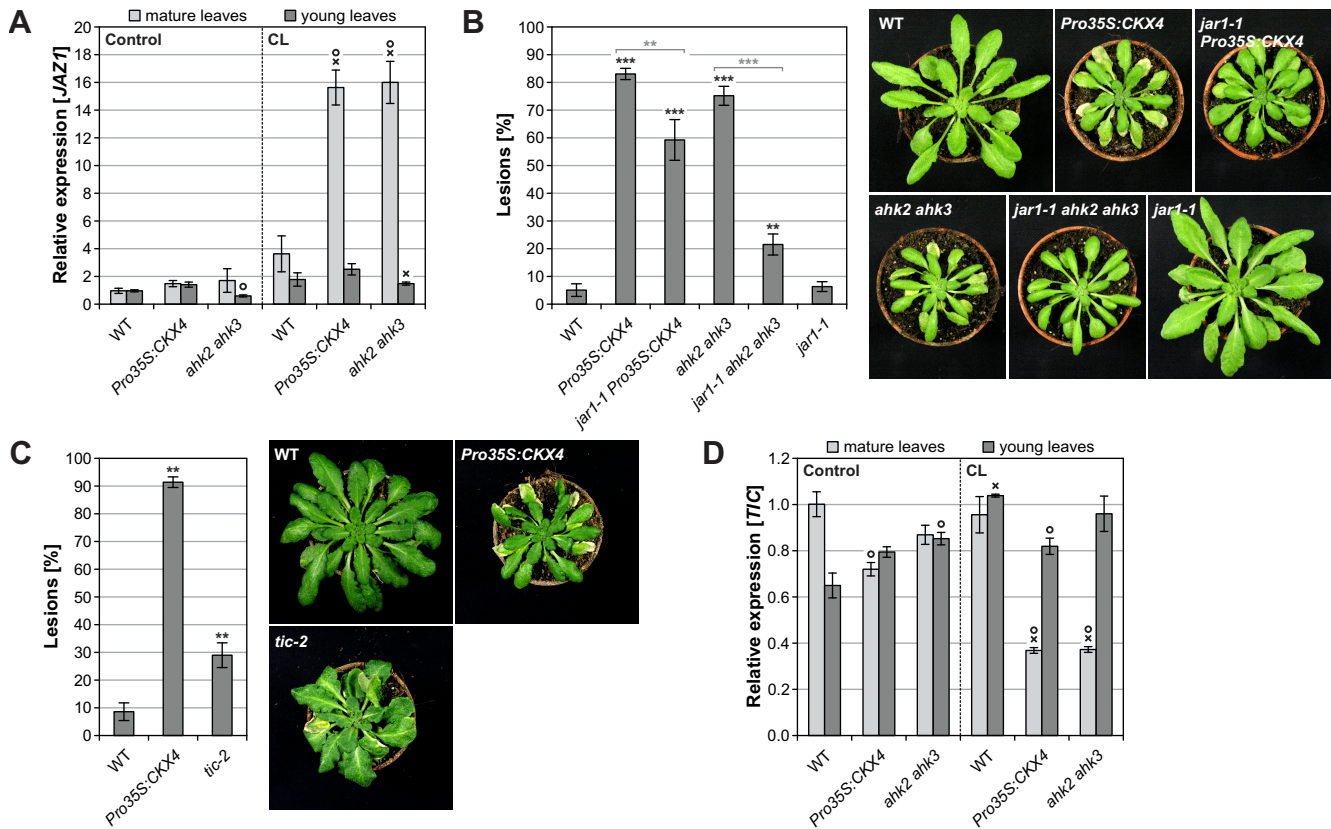

**Supplemental Figure 11.** Circadian Stress-Induced Cell Death in Cytokinin-Deficient Plants Is Linked to an Activated Jasmonic Acid Pathway.

**(A)** Transcript levels of the *JAZ1* gene in mature and young leaves at the end of a 16-h dark period following CL treatment (four biological replicates). The experimental scheme is shown in Supplemental Figure 5A. Expression levels were normalized to the mature leaves wild-type control, which was set to 1.

**(B)** and **(C)** Percentage of mature leaves with lesions in cytokinin-deficient plants in wild-type and *jar1-1* background (**[B]**,  $n = 10$ ) and *Pro35S:CKX4* plants in comparison with *tic-2* plants (**[C]**,  $n = 10$ ) 1 d after CL treatment. Plants were 5 to 6 weeks old. For each experimental setup representative pictures of the plant phenotypes 2 to 3 d after CL treatment are shown.

**(D)** Transcript levels of the *TIC* gene in mature and young leaves. The experimental design is the same as in **(A)**. Data are mean values  $\pm$  SE. Symbols in **(A)** and **(D)** indicate significant differences ( $P < 0.05$ ;  $t$  test) from the corresponding control (X) and the respective wild type (O). Asterisks in **(B)** and **(C)** indicate significant differences from wild type (black) and between cytokinin-deficient plants in the wild-type or *jar1-1* background (gray, in **[B]** only). \*\*  $P < 0.01$ ; \*\*\*  $P < 0.001$  ( $t$  test).

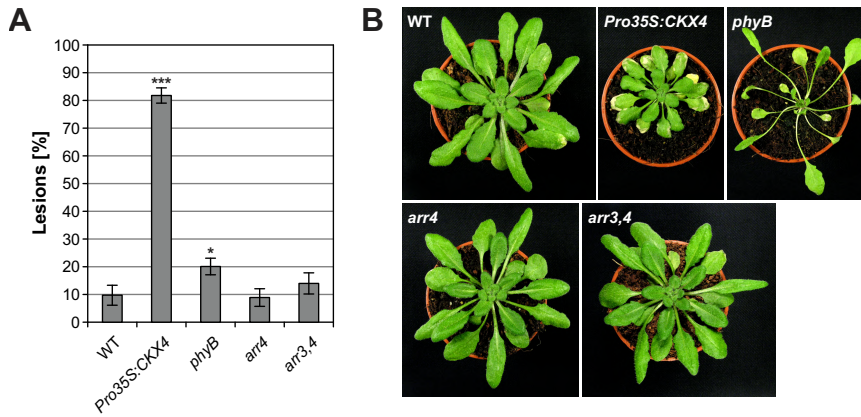

**Supplemental Figure 12.** PHYB, ARR3, and ARR4 Have No Major Role under Circadian Stress.

**(A)** Percentage of mature leaves with lesions in *phyB*, *arr4*, and *arr3,4* mutants compared with *Pro35S:CKX4* plants 1 d after CL treatment. Plants were 6 weeks old. Data are mean values  $\pm$  SE ( $n = 10$ ). Asterisks indicate significant differences from wild type. \*  $P < 0.05$ ; \*\*\*  $P < 0.001$  (t test).

**(B)** Representative pictures of the plant phenotypes 2 d after CL treatment.

**Supplemental Table 1. Primers Used in this Study.**

| <b>Gene</b>   | <b>Accession Number</b> | <b>Forward Primer</b>    | <b>Reverse Primer</b>      | <b>Efficiency [%]</b> |
|---------------|-------------------------|--------------------------|----------------------------|-----------------------|
| <i>ARR4</i>   | AT1G10470               | CCGTTGACTATCTCGCCT       | CGACGTCAACACGTCATC         | 83.4                  |
| <i>ARR7</i>   | AT1G19050               | CTTGGAACCAATCTGCTCTC     | ATCATCGACGGCAAGAAC         | 90.8                  |
| <i>ARR9</i>   | AT3G57040               | GATAGAGCACGTCCTAGATTCG   | CTGCATTCCCTACTGAAACC       | 86.4                  |
| <i>ARR16</i>  | AT2G40670               | TCAGGAGGTTCTTGTTCGTCTT   | AACCCAAATACTCCAATGC        | 114.0                 |
| <i>BAP1</i>   | AT3G61190               | CCAGAGATTACGGCGCGTGTT    | TACAGACCCCAACCGGAACTCC     | 99.0                  |
| <i>BFN1</i>   | AT1G11190               | GCCGGACCAGCACATGTAGT     | TAAGAGCAGGCTTGGTCGGGA      | 89.5                  |
| <i>BI1</i>    | AT5G47120               | GCTCTTGTGGCGTCTGCCTT     | AAGGGGCCAACAGAAGCACC       | 91.3                  |
| <i>CAB2</i>   | AT1G29920               | AGAGGCCGAGGACTTGCTTTAC   | GCCAATCTCCGTTCTTGAGC       | 93.4                  |
| <i>CAT2</i>   | AT4G35090               | CCGCCTGCTGTCTGTTCT       | AATCGTTCTTGCCTCTCTGGT      | 89.6                  |
| <i>CCA1</i>   | AT2G46830               | AGCAACGTGAAAGGTGGACTGAG  | GCGCTTGACCCATAGCTACACC     | 88.8                  |
| <i>COI1</i>   | AT2G39940               | ACAAGGAATGGAGGACGAAG     | GGCGGAAGTCACAGAGGT         | 92.6                  |
| <i>ELF3</i>   | AT2G25930               | AACAGCAACAGCCAACAAAG     | GTCACCTCCCCCATCTCT         | 94.4                  |
| <i>ELF4</i>   | AT2G40080               | AGGCAGAGCAGGGAGAGG       | GGTGATTGTCGTTGACTTGTTG     | 93.2                  |
| <i>FER1</i>   | AT5G01600               | CAACGGTGACCACACGCCTT     | ACGAGAGTGCGTTTGAGGCC       | 86.8                  |
| <i>JAZ1</i>   | AT1G19180               | CCCAACACCATTGACAGAAC     | CTAAACCGAGCCACGACA         | 88.0                  |
| <i>LHY</i>    | AT1G01060               | CAACGAAACAGGTAAGTGGCGACA | TGCGTGGAAATGCCAAGGGT       | 87.5                  |
| <i>LOX3</i>   | AT1G17420               | ACGTTGTCGTAAGTGGCGCC     | GTCTCGTGGCACATACATAGGTAATG | 88.7                  |
| <i>LOX4</i>   | AT1G72520               | AAGGTCTCCCTGCTGATCTCAT   | AAGCCCATGTGGTTGTGTTG       | 94.4                  |
| <i>LUX</i>    | AT3G46640               | GCTCATCATCTTCACAAACCA    | CTTCGTCGCTTGGTAATCC        | 87.0                  |
| <i>MCP2D</i>  | AT1G79340               | AACCCGCTATGCAGACACACG    | CAGTTGGTTTCCCCGCTGGA       | 96.1                  |
| <i>MYC2</i>   | AT1G32640               | CAGAGAACTCCAATCAAGAACC   | CAACGCCGACATCAACCT         | 87.0                  |
| <i>OPR3</i>   | AT2G06050               | GAGACATGACGGCGGCACAA     | AATACTCTGCCAACGCCGCG       | 90.8                  |
| <i>PP2AA2</i> | AT3G25800               | CCATTAGATCTTGTCTCTGCT    | GACAAAACCCGTACCGAG         | 89.1                  |
| <i>PRR3</i>   | AT5G60100               | TGGGAGTAGTGGTGGTTTGAG    | ATTGATTTGAAGGCGAGGTG       | 96.0                  |
| <i>PRR5</i>   | AT5G24470               | GAATGAAGCGAAAGGACAGA     | GATTGGACTTGACGAACGAA       | 89.3                  |
| <i>PRR7</i>   | AT5G02810               | CATCGTTTCAGCCTTTACCC     | CATTCTCCAGCATTATACC        | 91.0                  |
| <i>PRR9</i>   | AT2G46790               | TATGGGGGAGATTGTGGTTT     | GGCAGTGATGATTTGACGAG       | 88.2                  |
| <i>SAG12</i>  | AT5G45890               | TCTGGTGTGTTCACTGGAGAGT   | ATCCGTTAGTAGATTCGCCGTA     | 101.0                 |
| <i>SAND</i>   | AT2G28390               | CAGATTCGAGGTCTTCTCCT     | GTGTGGCTACCATCAGAGACT      | 76.2                  |
| <i>TIC</i>    | AT3G22380               | TATGACGACGGAGGTGTAGG     | ATTGTTGTGGCTGTGATGGT       | 94.5                  |
| <i>TOC1</i>   | AT5G61380               | TTGGTCACCGGCAGGAAATCC    | ACTGACCCTAACGCGGGGT        | 107.0                 |
| <i>UBC10</i>  | AT5G53300               | CCATGGGCTAAATGGAAA       | TTCATTTGGTCTGTCTTCCAG      | 89.4                  |
| <i>ZAT12</i>  | AT5G59820               | CGCTTTGTCGTCTGGATTG      | AGCAGCCCCACTCTCGTT         | 88.6                  |

**Supplemental Table 2. List of Accession Numbers.**

| <b>Gene</b>      | <b>Accession Number</b> |  | <b>Gene</b>   | <b>Accession Number</b> |
|------------------|-------------------------|--|---------------|-------------------------|
| <i>AHK2</i>      | AT5G35750               |  | <i>IPT3</i>   | AT3G63110               |
| <i>AHK3</i>      | AT1G27320               |  | <i>IPT5</i>   | AT5G19040               |
| <i>AHK4/CRE1</i> | AT2G01830               |  | <i>IPT7</i>   | AT3G23630               |
| <i>ARR1</i>      | AT3G16857               |  | <i>JAR1</i>   | AT2G46370               |
| <i>ARR2</i>      | AT4G16110               |  | <i>JAZ1</i>   | AT1G19180               |
| <i>ARR4</i>      | AT1G10470               |  | <i>LHY</i>    | AT1G01060               |
| <i>ARR7</i>      | AT1G19050               |  | <i>LOX3</i>   | AT1G17420               |
| <i>ARR9</i>      | AT3G57040               |  | <i>LOX4</i>   | AT1G72520               |
| <i>ARR10</i>     | AT4G31920               |  | <i>LUX</i>    | AT3G46640               |
| <i>ARR12</i>     | AT2G25180               |  | <i>MCP2D</i>  | AT1G79340               |
| <i>ARR16</i>     | AT2G40670               |  | <i>MYC2</i>   | AT1G32640               |
| <i>BAP1</i>      | AT3G61190               |  | <i>OPR3</i>   | AT2G06050               |
| <i>BFN1</i>      | AT1G11190               |  | <i>PP2AA2</i> | AT3G25800               |
| <i>BI1</i>       | AT5G47120               |  | <i>PRR3</i>   | AT5G60100               |
| <i>CAB2</i>      | AT1G29920               |  | <i>PRR5</i>   | AT5G24470               |
| <i>CAT2</i>      | AT4G35090               |  | <i>PRR7</i>   | AT5G02810               |
| <i>CCA1</i>      | AT2G46830               |  | <i>PRR9</i>   | AT2G46790               |
| <i>CKX1</i>      | AT2G41510               |  | <i>SAG12</i>  | AT5G45890               |
| <i>CKX2</i>      | AT2G19500               |  | <i>SAND</i>   | AT2G28390               |
| <i>CKX4</i>      | AT4G29740               |  | <i>TIC</i>    | AT3G22380               |
| <i>COI1</i>      | AT2G39940               |  | <i>TOC1</i>   | AT5G61380               |
| <i>ELF3</i>      | AT2G25930               |  | <i>UBC10</i>  | AT5G53300               |
| <i>ELF4</i>      | AT2G40080               |  | <i>ZAT12</i>  | AT5G59820               |
| <i>FER1</i>      | AT5G01600               |  |               |                         |
